1  
2  
3  
4  
5  
6  
7  
8  
9  
10  
11  
12  
13  
14  
15  
16  
17  
18  
19  
20  
21  
22  
23

**Time in treatment: Examining mental illness trajectories across inpatient psychiatric treatment**

Hyuntaek Oh<sup>a,b</sup>\*, Jaehoon Lee<sup>c</sup>, Seungman Kim<sup>c</sup>, Katrina A. Rufino<sup>b,d</sup>, Peter Fonagy<sup>e</sup>, John M. Oldham<sup>a,b</sup>, Bella Schanzer<sup>a,b</sup>, Michelle A. Patriquin<sup>a,b</sup>

<sup>a</sup> Menninger Department of Psychiatry and Behavioral Sciences, Baylor College of Medicine, 1977 Butler Blvd., Houston TX, 77030 USA

<sup>b</sup> The Menninger Clinic, 12301 S Main St, Houston TX, 77035 USA

<sup>c</sup> Department of Educational Psychology and Leadership, College of Education, Texas Tech University, 3002 18<sup>th</sup> Street, Lubbock TX, 79409 USA

<sup>d</sup> Department of Social Sciences, University of Houston – Downtown, One Main St, Houston TX, 77002 USA

<sup>e</sup> Research Department of Clinical, Educational and Health Psychology, University College London, UK

\* Corresponding Author: Hyuntaek Oh, PhD.

12301 S Main St, Houston TX 77030 USA

Email: [hoh@menninger.edu](mailto:hoh@menninger.edu)

[hyuntaek.oh@bcm.edu](mailto:hyuntaek.oh@bcm.edu)

24 **Abstract**

25 Early discharge or reduced length of stay for inpatient psychiatric patients is related to  
26 increased readmission rates and worse clinical outcomes including increased risk for  
27 suicide. Trajectories of mental illness outcomes have been identified as an important  
28 method for predicting the optimal length of stay but the distinguishing factors that  
29 separate trajectories remain unclear. We sought to identify the distinct classes of  
30 patients who demonstrated similar trajectories of mental illness over the course of  
31 inpatient treatment, and we explore the patient characteristics associated with these  
32 mental illness trajectories. We used data ( $N = 3,406$ ) from an inpatient psychiatric  
33 hospital with intermediate lengths of stay. Using growth mixture modeling, latent mental  
34 illness scores were derived from six mental illness indicators: psychological flexibility,  
35 emotion regulation problems, anxiety, depression, suicidal ideation, and disability. The  
36 patients were grouped into three distinct trajectory classes: (1) High-Risk, Rapid  
37 Improvement (HR-RI); (2) Low-Risk, Gradual Improvement (LR-GI); and (3) High-Risk,  
38 Gradual Improvement (HR-GI). The HR-GI was significantly younger than the other two  
39 classes. The HR-GI had significantly more female patients than males, while the LR-GI  
40 had more male patients than females. Our findings indicated that younger females had  
41 more severe mental illness at admission and only gradual improvement during the  
42 inpatient treatment period, and they remained in treatment for longer lengths of stay,  
43 than older males.

44

45 **Keywords:** length of stay, growth mixture modeling, trajectory, anxiety, depression

46

## 47 **Introduction**

48 Inpatient psychiatry lengths of stay (LOS) in the United States have been becoming  
49 shorter and shorter, with the average inpatient LOS now approximately five to six days  
50 (Glick et al., 2011; Sturm and Bao, 2000). Although some studies indicate that shorter  
51 LOS is as effective as longer LOS (e.g., 30 days) in reducing symptoms of dementia  
52 (Kunik et al., 2001), major depression (Pettit et al., 2005), and schizophrenia (Johnstone  
53 and Zolese, 1999), others have indicated that psychiatric morbidity is greater at  
54 discharge among psychiatric patients with a shorter LOS than those with a longer LOS  
55 (Glick et al., 2011; Rúaño et al., 2013). Meta-analytic results confirm that patients with a  
56 history of psychiatric disorders are at an increased risk of suicide (Harris and  
57 Barraclough, 1997) and the suicide risk is particularly high when the patients were  
58 discharged from psychiatric hospitals where the average LOS is between 5 to 7 days  
59 (Appleby et al., 1999; Goldacre et al., 1993). This is congruent with the literature  
60 indicating that a LOS of less than 14 days in inpatient psychiatry was significantly  
61 associated with a higher suicide risk (Desai et al., 2005). In addition to increased suicide  
62 risk with reduced LOS, other studies demonstrated that shorter LOS predicts greater  
63 risk of readmission (Lin et al., 2006; Rúaño et al., 2013). Despite the relationship  
64 between poorer outcome and reduced LOS, economic pressures to limit LOS for  
65 inpatient hospitalization have tended to tip the scale in favor of less time being needed  
66 for inpatient treatment (Compton et al., 2006; Hirsch et al., 1979).

67 In addition to economic pressure, studies have identified other clinical factors which  
68 appear to influence LOS for inpatient psychiatry. These include: prior hospitalization  
69 (Stevens et al., 2001), level of psychopathology (Cohen and Casimir, 1989), medical

70 comorbidity (Lyketsos et al., 2002), suicide risk (Cohen and Casimir, 1989), substance  
71 use (Warnke and Rossler, 2008), and psychiatric diagnoses (Blader, 2011).  
72 Hospitalization history and diagnoses of schizophrenia, major depression, and other  
73 psychotic disorders were correlated with extended LOS, whereas substance use was  
74 associated with reduced LOS (Blader, 2011; Clapp et al., 2013; Cohen and Casimir,  
75 1989; Hallak et al., 2003; Stevens et al., 2001; Warnke and Rossler, 2008).  
76 Associations between LOS and demographic information (e.g., sex, marital status,  
77 homelessness) were also noted in several studies but findings are mixed (Averill et al.,  
78 2001; Cohen and Casimir, 1989; Warnke and Rossler, 2008). A limitation of the  
79 correlational approach taken to identifying predictors of LOS is that it assumes an  
80 underlying homogeneity and explores primarily linear predictors of LOS. In principle it is  
81 perfectly possible that in some instances, when it retards recovery severity predicts  
82 increased LOS while in others, where high severity scores expedite rapid improvement,  
83 the association is reversed. Notably, there have been few studies that examined the  
84 trajectories of recovery over the course of psychiatric hospitalization and how these  
85 patterns can be predicted from patient characteristics, and how they relate to treatment  
86 and follow-up outcomes. Being able to identify groups of patients based on information  
87 available on admission (e.g. demographic, self-reported symptom data), allows  
88 clinicians to anticipate likely treatment response and support effective decision making  
89 by stratifying care (Saunders et al., 2019).

90 Growth mixture modeling (GMM) is a statistical method designed to identify classes of  
91 individuals who are homogeneous in terms of their longitudinal change in a set of  
92 variables of interest (Muthén, 2006; Ram and Grimm, 2009). GMM has been useful for

93 recognizing classes of patients who share similar longitudinal trajectories of depressive  
94 symptoms (Bombardier et al., 2016; Gomez et al., 2017; Saunders et al., 2019;  
95 Saunders et al., 2020). However, these were either studies of outpatient treatments or  
96 did not consider other psychiatric disorders or their comorbidity. Another study, although  
97 the finding could be limited to older adults, has also utilized GMM to examine the factors  
98 related to longitudinal trajectories of PTSD symptoms after a hurricane disaster  
99 (Pietrzak et al., 2013).

100 The present study applied GMM to longitudinal clinical data obtained from a large  
101 sample of adults admitted to an inpatient psychiatric hospital. We considered six key  
102 psychiatric indicators to agnostically determine trajectories of change in mental illness  
103 outcomes during inpatient psychiatric treatment: psychological flexibility (Kashdan and  
104 Rottenberg, 2010), emotion regulation problems (Gross and Muñoz, 1995), anxiety  
105 (Ormel et al., 1994), depression (Ormel et al., 1994), suicide ideation severity (Kessler  
106 et al., 1999), and disability (Ormel et al., 1994). The aims of this study were to (1)  
107 establish the patterns of change in mental health, and (2) identify the variables  
108 associated with the trajectories. It was hypothesized that different mental illness  
109 trajectories would emerge (e.g., those that showed improvement, those that showed  
110 treatment resistance), yet the specific number of trajectories was not assumed as this  
111 was considered an exploratory approach. We also examined a number of demographic  
112 and clinical variables (see Table 1 and 2) that are relevant to mental illness outcomes  
113 and hospitalization to identify the demographic and clinical variables associated with the  
114 identified patterns of change in mental illness. Lastly, we hypothesized that improved  
115 mental illness outcomes would be associated with longer LOS, rather than shorter LOS.

116

## 117 **Materials and methods**

### 118 Participants

119 Study participants ( $N = 3,406$ ) were adults admitted to a private inpatient psychiatric  
120 hospital in Houston, Texas between 2012 and 2017. The patients were equally split by  
121 sex (female:  $n = 1,637$ , 48.1%). On average, the patients were 35.24 years old ( $SD =$   
122 15.04; range = 17-89); and the majority of patients identified as White ( $n = 3,029$ ,  
123 88.9%) followed by multiracial or “other” ( $n = 176$ , 5.2%) and Asian ( $n = 71$ , 2.1%). LOS  
124 was defined as the number of days between admission date and discharge date for  
125 each participant. The average LOS of the participants was 42.16 days ( $SD = 20.9$ ;  
126 range = 0-238 days). About half of the patients ( $n = 1,653$ , 48.5%) stayed at least six  
127 weeks in the hospital.

128

### 129 Data procedures and measures

130 Data were collected as part of the clinic’s outcomes study aimed to monitor longitudinal  
131 treatment response during inpatient psychiatric treatment (Allen et al., 2009). We  
132 administrated clinical measures at admission, bi-weekly, and discharge. The study  
133 protocols were approved by the Institutional Review Board at Baylor College of  
134 Medicine.

135 The severity of depressive symptoms, anxiety symptoms, psychological flexibility,  
136 emotion regulation and dysregulation, and disability were measured by using the Patient  
137 Health Questionnaire (PHQ-9) (Kroenke et al., 2001), General Anxiety Disorder Scale  
138 (GAD-7) (Spitzer et al., 2006), Acceptance and Action Questionnaire II (AAQ-II) (Bond

139 et al., 2011; Hayes et al., 2004), Difficulties in Emotion Regulation Scale (DERS) (Graz  
140 and Roemer, 2004), and WHO Disability Assessment Schedule 2.0 (WHODAS 2.0)  
141 (Üstün et al., 2010), respectively. The Columbia-Suicide Severity Rating Scale (C-  
142 SSRS) was also used to examine suicidal ideation and behavior in the past 30 days and  
143 at present (Posner et al., 2011).

144 The Structural Clinical Interview for DSM-5 Disorders (SCID-5, SCID-5-PD) is the most  
145 widely used semi-structured clinical interview administered by a trained interviewer  
146 (First et al., 2015; First, 1997). The SCID-5-PD is used to assess for the presence of  
147 DSM-5 personality disorders. The SCID-5 is a diagnostic measure assessing mood  
148 disorders, psychotic disorders, substance use disorders, anxiety disorders, obsessive-  
149 compulsive disorders, eating disorders, somatic symptom disorders, insomnia, and  
150 trauma-related disorders. The SCID-5 and SCID-5-PD were administered at admission  
151 by trained clinical interviewers under supervision of a licensed psychologist.

152 As we have done previously (Hartwig et al., 2019; Oh et al., 2020), medication and  
153 psychotherapy information were extracted from patient medical records and treatment  
154 notes, respectively. Medication information (e.g., medication type, medication taken  
155 during the treatment) was measured one week prior to patient discharge date, as  
156 patients' medication regimen had been stabilized by this time point. Medications were  
157 classified into the following categories: tricyclic antidepressants (TCA), selective  
158 serotonin reuptake inhibitors (SSRI), antidepressant other (e.g., Wellbutrin, trazodone),  
159 serotonin and norepinephrine reuptake inhibitors (SNRI), benzodiazepine, dopaminergic  
160 stimulants agents, first- and second-generation antipsychotics, hypnotics, non-opioid  
161 analgesics, and miscellaneous analgesics (e.g., gabapentin). Psychotherapy

162 information (e.g., type of psychotherapy and frequency) was recorded in the patient's  
163 treatment notes after receiving psychotherapies. Psychotherapies were classified into  
164 the following categories: psychodynamic, cognitive-behavioral therapy (CBT), and  
165 family therapy.

#### 166 Data analysis

167 GMM was used to classify patients into distinct classes, each manifesting a unique  
168 pattern of change in mental illness measured by six indicators: AAQ, DERS, GAD-7,  
169 PHQ-9, C-SSRS, and WHO-DAS. GMM postulates that similarities and differences in  
170 longitudinal observations may be explained by the existence of a categorical latent  
171 variable that represents a few mutually exclusive classes within the population (Nylund  
172 et al., 2007). In this study, a series of third-order GMM models were fitted to the patients'  
173 scores on the six mental illness indicators observed at four different time points  
174 (admission, 2-week, 4-week, and 6-week; Fig. 1). Those six mental illness indicators  
175 were loaded on a first-order latent variable, named Mental Illness, at each time point;  
176 and the loadings of each indicator were constrained to be equal across time to achieve  
177 temporal measurement invariance. Cross-time residual covariances were also specified  
178 for each indicator in the models (they are omitted in Fig. 1 for the sake of simplicity).  
179 The Mental Illness latent variables were loaded on two or three second-order growth  
180 factors: Intercept and Linear Slope (2 latent variables); or Intercept, Linear Slope and  
181 Quadratic Slope (3 latent variables). Those growth factors were then loaded on a third-  
182 order class factor (1 categorical latent variable). A total of eight models were fitted – 1 to  
183 4 unique patterns of linear growth (4 models) and another 1 to 4 unique patterns of  
184 quadratic growth (4 models) (Table 3). Model parameters, including factor loadings,



185 means and variances/covariances of the growth factors, and class probabilities, were  
186 estimated by using robust maximum likelihood (MLR) via accelerated expectation-  
187 maximization algorithm, which often yields estimates and sandwich standard errors that  
188 are robust to non-normality and non-independence of data.

189 Next, the shape of growth (linear vs. quadratic) and the optimal number of growth  
190 patterns (classes) were determined by comparing the models in terms of (a) entropy  
191 that quantifies the amount of classification error (Celeux and Soromenho, 1996;  
192 Ramaswamy et al., 1993) – a larger value and close to 1 indicates less classification  
193 error made by the model; (b) average classification posterior probabilities (ACPP)  
194 (Nagin, 1999) – high values at the diagonal of a classification table and low values at  
195 the off-diagonal of the table indicate good classification quality; and (c) Bayesian  
196 Information Criterion (BIC) (Schlove, 1987) – lower values indicate a better fitting model.  
197 Note that Parametric bootstrap likelihood-ratio test (BLRT) (McLachlan et al., 2000) was  
198 also performed, but the test results were discarded because they had local maxima  
199 issues in the bootstrapping process. Entropy and ACPP could not be computed for the  
200 case of single class and thus comparisons were not made against the 1-class models.

201 Once the GMM analysis successfully identified distinct classes of patients who share  
202 similar longitudinal trajectories of mental illness, a post-hoc analysis was conducted to  
203 understand the characteristics of these classes – or equivalently, to find potential  
204 antecedents and consequences of differential treatment efficacy. In this second stage,  
205 the identified classes were compared in terms of theoretically relevant and meaningful  
206 variables such as age, sex, ethnicity, marital status, educational level, occupation,  
207 previous experiences of psychotherapy, hospital care, medication use history, and

208 current length of stay, etc. Chi-square tests of independence were used for the  
209 comparisons of categorical variables; independent-samples t-tests or analyses of  
210 variance (ANOVA), depending on the number of identified classes, were performed for  
211 the comparisons of continuous variables. Statistical significance was determined at a  
212 0.05 alpha level, or at a level reduced to control for Type I error in multiple pairwise  
213 comparisons (i.e., Bonferroni adjustment). All analyses were conducted using Mplus 8.0  
214 (Muthén and Muthén, 2018) and SAS 9.4 (SAS Institute, 2013).

215

## 216 **Results**

### 217 Find the distinct patterns of recovery in mental illness

218 The patients were grouped into three mutually exclusive classes as optimally  
219 representing three different patterns of (quadratic) change in mental illness over the  
220 inpatient treatment period. Specifically, the entropy values of greater than .80 showed a  
221 clear delineation of classes in the ‘quadratic’ GMM models with two or three classes  
222 (Celeux and Soromenho, 1996). Further, the ACPP values from the ‘quadratic’ model  
223 with three classes (.84-.92 at the diagonal of the classification table and 0-.08 at the off-  
224 diagonal) denoted the best classification quality among the models being tested. The  
225 BIC values decreased as the number of classes increased in the case of either linear or  
226 quadratic patterns of growth. However, caution should be exercised when interpreting  
227 this result because BIC tends to overestimate the number of classes (Enders and  
228 Tofighi, 2008; Henson et al., 2007; Nylund et al., 2007). Thus, considering the results of  
229 entropy and ACPP, we chose the ‘quadratic’ GMM model with three classes as the final  
230 solution.

231 The final model solution was substantively interpretable – the identified classes of  
232 patients indeed represented three distinctive patterns of change in mental illness (see  
233 Fig. 2). The first class, the largest class including 55.4% of the sample, showed more  
234 severe mental illness at the beginning of the treatment (i.e., high latent scores) but their  
235 mental illness improved substantially across inpatient psychiatric treatment, particularly  
236 in the first two weeks of treatment. Thus, this class was referred to as High-Risk, Rapid  
237 Improvement (HR-RI). The second largest class (28%) included patients with less  
238 severe mental illness at the start of the treatment (i.e., low latent scores) who made  
239 gradual improvement during the treatment. The extent of recovery was lessened at the  
240 later stage of the treatment (i.e., the slope of the line is closer to 0). This second class  
241 was referred to as Low-Risk, Gradual Improvement (LR-GI). The last class of patients  
242 (16.7%) was characterized by more severe mental illness at the beginning of the  
243 treatment, similar to the HR-RI class, but these patients made only gradual  
244 improvements over the treatment period – High-Risk, Gradual Improvement (HR-GI).  
245 The means of the individual indicators of mental illness and their changes at four  
246 different time points are shown in Fig. 3. Additionally, follow-up assessments of anxiety  
247 and depressive symptoms (at 2 weeks, 3 months, 6 months, and 1-year post-discharge)  
248 are displayed in Fig. 3A. As expected, all observed scores were well aligned with the  
249 ‘model-implied’ longitudinal trajectories (i.e., estimated latent scores) of mental illness  
250 during inpatient psychiatric treatment.

251

252 Identify patient characteristics associated with differential treatment efficacy

253 The post-hoc analyses revealed similarities and differences among the three identified  
254 classes. Table 1 and 2 provide the descriptive statistics, the results of bivariate tests,  
255 ANOVA, and follow-up pairwise comparisons. On average, the HR-GI class ( $33.24 \pm$   
256  $13.71$ ) was significantly younger than both the HR-RI ( $35.26 \pm 14.99$ ; adjusted  $p < 0.05$ )  
257 and the LR-GI ( $36.38 \pm 15.79$ ; adjusted  $p < 0.001$ ) classes, while the age of the latter  
258 two classes was not significantly different (adjusted  $p = 0.18$ ). The LR-GI class had  
259 more male patients (63.4%) than females (36.6%), while the HR-GI class had more  
260 female patients (59.8%) than males (40.2%) ( $p < 0.001$ ); The HR-RI class had an  
261 equivalent number of males (49.6%) and females (50.4%). The three classes  
262 demonstrated similar ethnic breakdowns ( $p = 0.33$ ) – the majority of the class members  
263 were white (87.9-90.1%) followed by multiracial or “other” category (5-5.2%) and Asian  
264 (1.5-2.3%), as observed in the overall sample. The patients’ marital status did not differ  
265 among the three classes ( $p = 0.71$ ). Also, the patients’ education level ( $p = 0.23$ ) and  
266 occupation ( $p = 0.97$ ; see Supplementary) were not significantly related to their patterns  
267 of recovery.

268 Regarding clinical history and LOS in treatment, the patients in three different classes  
269 reported similar previous experiences of psychotherapy, hospital care, and stopping  
270 medication (all  $p > 0.05$ ; see Table 2). However, significantly fewer patients in the HR-  
271 RI class took hypnotic medications ( $19.79 \pm 19.72\%$ ) compared to the LR-GI class  
272 ( $27.97 \pm 27.29\%$ ) (adjusted  $p < .01$ ). Also, significantly fewer patients in the HR-RI class  
273 took antidepressant other (e.g., Wellbutrin, trazodone) ( $37.84 \pm 33.61\%$ ) and SSRI  
274 ( $34.82 \pm 24.28\%$ ) medications compared to the HR-GI class ( $44.68 \pm 39.03\%$  and  $41.33$   
275  $\pm 28.59\%$ , respectively) (both adjusted  $p < .01$ ). The HR-RI class ( $41.49 \pm 20.25$ ) stayed

276 in their current hospitalization for significantly shorter periods of time than the HR-GI  
277 class ( $44.40 \pm 21.29$ ; adjusted  $p < 0.05$ ), with the HR-RI group staying approximately 3  
278 days shorter than the HR-GI class. The average LOS for the LR-GI class ( $42.27 \pm$   
279  $21.90$ ) was in between the average LOS for the two High-Risk classes and did not  
280 significantly deviate (adjusted  $p = 1.00$  and  $0.17$ ). SCID-5 and SCID-5-PD DSM-5  
281 clinical diagnosis differences were also examined within each class (see  
282 Supplementary). The most common diagnoses in both the HR-RI and LR-GI classes  
283 were (1) major depressive disorder, recurrent (HR-RI = 42%; LR-GI = 39%), followed by  
284 (2) anxiety not otherwise specified (HR-RI = 27%; LR-GI = 31%), (3) substance  
285 dependence disorder (HR-RI = 27%; LR-GI = 29%), (4) generalized anxiety disorder  
286 (HR-RI = 19%; LR-GI = 20%), and (5) alcohol abuse disorder (HR-RI = 17%; LR-GI =  
287 16%). The HR-GI class also had similar common diagnoses to the HR-RI and LR-GI  
288 classes, but with substance dependence disorder more prevalent than anxiety not  
289 otherwise specified: (1) major depressive disorder, recurrent (HR-GI = 45%), followed  
290 by (2) substance dependence disorder (HR-GI = 28%), (3) anxiety not otherwise  
291 specified (HR-GI = 26%), (4) generalized anxiety disorder (HR-GI = 21%), and (5)  
292 alcohol abuse disorder (HR-GI = 16%). Finally, the type and frequency of  
293 psychotherapy sessions received during inpatient psychiatric treatment did not differ  
294 between the three classes ( $p = .37$ ; see Table 2).

295

## 296 **Discussion**

297 Aims of the current study were to (a) find the distinct classes of patients who  
298 demonstrate similar trajectories of mental illness outcomes during inpatient psychiatric

299 treatment, and (b) identify patient characteristics associated with the identified patterns  
300 of recovery over time. Through the use of growth mixture modeling, we were able to  
301 describe three distinct trajectories (HR-RI, LR-GI, and HR-GI) of mental illness  
302 improvement across inpatient psychiatric hospitalization as measured by six indicators:  
303 psychological flexibility, emotion regulation problems, anxiety, depression, suicide  
304 ideation severity, and disability. Patients' age and sex were significantly related to  
305 treatment response, with significantly younger females in the HR-GI group and more  
306 males in the LR-GI group.

307 The findings of the present study support our hypothesis that different mental illness  
308 trajectories would emerge by identifying three classes of patients that are distinct in  
309 terms of mental illness at the beginning of treatment and change over their  
310 hospitalization. These findings suggest that the patient classes could be differentiated at  
311 the beginning of the treatment and by the improvement of six indicators during inpatient  
312 psychiatric treatment. The most common trajectory class was characterized by more  
313 severe mental illness at the beginning of the treatment and rapid treatment  
314 improvement during inpatient psychiatric treatment, referred as HR-RI (55.4%). The  
315 second class, LR-GI (28%), was characterized by less severe mental illness than the  
316 HR-RI group at the start of the treatment and gradual improvement during the inpatient  
317 treatment. The last class of patients, HR-GI (16.6%), demonstrated the highest severity  
318 of mental illness at admission and gradual improvement over the treatment period. Thus,  
319 the majority of patients could be categorized as following a path to recovery from a fairly  
320 severe experience of mental health and only a smallish group (16%) of severely  
321 impacted patients could be categorized as poor responders.

322 Having said that, all trajectory classes demonstrated improvement (significant negative  
323 slope of trajectories) in mental illness across treatment and their improvement was most  
324 rapid after psychiatric hospitalization, consistent with earlier studies that reported  
325 depressive symptoms and suicide ideation reduction following the first week of  
326 admission or even brief intervention (Clapp et al., 2013; Czyz and King, 2015; Hirsch et  
327 al., 1979; Hopko et al., 2001; Lieberman et al., 1998; Pettit et al., 2005; Prinstein et al.,  
328 2008; Rocca et al., 2010). Factors contributing to rapid improvement may include  
329 medication effects (e.g., antidepressant, antipsychotic agents) (Agid et al., 2003;  
330 Posternak and Zimmerman, 2005), removal of alcohol and substances, and  
331 psychotherapy gains (Stiles et al., 2003). All classes sustained their improvement  
332 related to anxiety and depression post-discharge from the hospital (i.e., anxiety and  
333 depression scores post-discharge were in the normal range (Kroenke and Spitzer,  
334 2002; Spitzer et al., 2006)), although generalization of these findings is limited as there  
335 was participation attrition at follow-up.

336 Our results are consistent with other studies demonstrating the follow-up assessments  
337 of depressive symptoms after hospitalization for traumatic brain injury (Bombardier et al.,  
338 2016) and maternal depressive symptoms from pregnancy through 2 years postpartum  
339 (Mora et al., 2008). However, these prior studies also reported a trajectory showing  
340 gradual reemergence of depressive symptoms which may associate with a history of  
341 alcohol dependence and other mental illness disorders (Bombardier et al., 2016).

342 In the current study, we found that patients' age and sex best predict the particular  
343 patterns of mental illness recovery trajectories. The HR-GI class ( $33.24 \pm 13.71$ ) had  
344 patients who were significantly younger relative to the HR-RI ( $35.26 \pm 14.99$ ) and LR-GI

345 (36.38 ± 15.79) classes. The LR-GI class had fewer female patients than males,  
346 whereas HR-GI class had more female patients than males. These findings are  
347 consistent with previous studies that females have shown higher rates of depressive  
348 symptoms (Kandel and Davies, 1982), generalized anxiety disorder (Altemus et al.,  
349 2014; Kessler et al., 1994), and suicidal ideation (Borges et al., 2006; Crosby et al.,  
350 1999). Additionally, previous studies have consistently demonstrated higher rates of  
351 depressive symptoms (Kessler et al., 2010) and suicidal ideation (Crosby et al., 1999)  
352 among young adults. For the LR-GI class that had more men than women, as they were  
353 admitted to an inpatient psychiatric hospital, the likelihood that they did not present with  
354 mental illness symptoms is unlikely. Instead, as men have a higher rate of minimizing  
355 self-reported symptoms due to societal ideals of masculinity (Martin et al., 2013), it is  
356 possible that symptoms are minimized by this patient group.

357 We examined the LOS in each trajectory class and found that the HR-RI class stayed in  
358 the hospital less time (by a few days) than the HR-GI class (adjusted  $p < 0.05$ ). Note  
359 that the average LOS in this study was approximately 42.16 days which is a contrast to  
360 the previous studies (five to six days being the average LOS) (Glick et al., 2011; Sturm  
361 and Bao, 2000) that indicate negative treatment outcomes, including higher rates of  
362 death by suicide post-discharge (Appleby et al., 1999; Goldacre et al., 1993). Therefore,  
363 our results highlight not only better understanding of the distinct classes but emphasize  
364 the importance of a longer LOS in generating positive treatment outcomes for inpatient  
365 psychiatry. Previous studies have shown that patients with cognitive impairment had a  
366 significantly increased LOS, but such differences in LOS were not found among patients  
367 with depression and anxiety (Furlanetto and da Silva, 2003). However, other studies



368 have reported that depression, anxiety, schizophrenia, mood disorders, and alcohol and  
369 drug related disorders are important predictors of LOS (Borchardt and Garfinkel, 1991;  
370 Draper and Luscombe, 1998; Huntley et al., 1998; Jiménez et al., 2004; Sloan et al.,  
371 1999) and that psychiatric comorbidity could have contributed to prolonged LOS (Bressi  
372 et al., 2006; Saravay, 1994). In addition to clinical diagnoses, a previous study reported  
373 that longer LOS was associated with sex (i.e., females) (Averill et al., 2001). It should be  
374 noted that the most common diagnoses in all three classes were recurrent major  
375 depressive disorder, anxiety not otherwise specified, and substance dependence  
376 disorder. The HR-GI class, which showed longer LOS than the HR-RI class, had more  
377 female patients than males, as compared to other two classes. Clearly, the hypothesis  
378 (i.e., improved mental illness outcomes would be associated with longer LOS) was not  
379 supported by the data, but this group of patients deserves more careful scrutiny and  
380 their treatment path (more SSRI and more antidepressant other) indicates that during  
381 their slightly longer treatment a wider range of therapies were tried. Therefore, it is likely  
382 that significant factors related to LOS for inpatient psychiatry may relate to demographic  
383 factors, particularly sex. Perhaps, a bi-factor analytic approach would show them to  
384 have higher p Factor scores than the other two groups indicating a higher level of  
385 general psychopathology (Caspi and Moffitt, 2018; Smith et al., 2020).

386 A number of limitations of the present study should be addressed. First, the study  
387 sample was from an inpatient psychiatric hospital where most patients were white and  
388 had a higher level of education than the general population. Therefore, a future study  
389 needs to be replicated with a more diverse sample in order to ensure our findings are  
390 not limited to the present sample. Although follow-up assessments of depression and

391 anxiety showed that patients in this study maintained their improved status throughout  
392 their first year after discharge, the follow-up results should be interpreted with caution  
393 because there is potential for bias in the missing assessments (e.g., individuals who  
394 were in other treatment facilities post-discharge) - missing data after discharge: 82.8%  
395 at 2 weeks, 85.2% at 3 months, 88.3% at 6 months, and 91.1% at 1 year. While  
396 obtaining a more comprehensive follow up sample will always be challenging in the  
397 context of routine outcomes monitoring, data obtained from such a small proportion of  
398 the sample is very likely to be irredeemably contaminated by non-random forces  
399 associated with loss to follow-up (such as an understandable wish to obliterate an  
400 experience that may have felt stigmatizing). Data with fewer missing and frequent  
401 follow-up assessments of the indicators used in this study may help to improve our  
402 understanding of distinct trajectory classes after discharge and how clinical outcomes  
403 are/are not maintained following post-discharge.

404 In this study, we identified three distinct mental illness trajectory classes using a large  
405 sample of 3,406 patients admitted to a private inpatient psychiatric hospital. The  
406 majority of the patients with high mental illness at the beginning experienced substantial  
407 improvement within 6 weeks of inpatient psychiatric treatment and maintained their  
408 reduction in depression and anxiety throughout their first year after discharge. This  
409 study highlights the importance of understanding the relevance of the distinction of  
410 classes with meaningful patterns of mental illness treatment change over time. The  
411 knowledge of differences between the classes may provide valuable information for the  
412 clinicians as well as future researchers making predictions regarding the course of  
413 mental illness improvement during inpatient psychiatric treatment and after

414 hospitalization, and ultimately to ensure that patients receive the adequate length of  
415 stay for inpatient psychiatric treatment in order to maximize their mental illness  
416 outcomes.

417

#### 418 **Acknowledgement**

419 We thank past and present members of the research team at The Menninger Clinic for  
420 their contributions to research and data collection. We also thank The Menninger Clinic  
421 Information Technology department who provide the technical support to conduct  
422 research effectively.

423

#### 424 **Contributors**

425 All authors have approved the final article.

426 Conception: HO, JL, KR, JO, BS, and MP.

427 Data analysis: HO, JL, SK, KR, and MP.

428 Interpretation: HO, JL, KR, PF, JO, and MP.

429 Drafting the manuscript: HO, JL, KR, and MP.

430

#### 431 **Conflict of interest**

432 The author reports no conflicts of interest in this study.

433

#### 434 **Funding**

435 This research was supported by The Menninger Clinic Foundation.

436 **References**

- 437 Agid, O., Kapur, S., Arenovich, T., Zipursky, R.B., 2003. Delayed-onset hypothesis of  
438 antipsychotic action: a hypothesis tested and rejected. *Archives of general psychiatry*  
439 60(12), 1228-1235.
- 440 Allen, J.G., Frueh, B.C., Ellis, T.E., Latini, D.M., Mahoney, J.S., Oldham, J.M., Sharp, C.,  
441 Wallin, L., 2009. Integrating outcomes assessment and research into clinical care in  
442 inpatient adult psychiatric treatment. *Bulletin of the Menninger Clinic* 73(4), 259-295.
- 443 Altemus, M., Sarvaiya, N., Epperson, C.N., 2014. Sex differences in anxiety and  
444 depression clinical perspectives. *Frontiers in neuroendocrinology* 35(3), 320-330.
- 445 Appleby, L., Shaw, J., Amos, T., McDonnell, R., Harris, C., McCann, K., Kiernan, K.,  
446 Davies, S., Bickley, H., Parsons, R., 1999. Suicide within 12 months of contact with  
447 mental health services: national clinical survey. *Bmj* 318(7193), 1235-1239.
- 448 Averill, P.M., Hopko, D.R., Small, D.R., Greenlee, H.B., Varner, R.V., 2001. The role of  
449 psychometric data in predicting inpatient mental health service utilization. *Psychiatric*  
450 *Quarterly* 72(3), 215-235.
- 451 Blader, J.C., 2011. Acute inpatient care for psychiatric disorders in the United States,  
452 1996 through 2007. *Archives of general psychiatry* 68(12), 1276-1283.
- 453 Bombardier, C.H., Hoekstra, T., Dikmen, S., Fann, J.R., 2016. Depression trajectories  
454 during the first year after traumatic brain injury. *Journal of neurotrauma* 33(23), 2115-  
455 2124.
- 456 Bond, F.W., Hayes, S.C., Baer, R.A., Carpenter, K.M., Guenole, N., Orcutt, H.K., Waltz,  
457 T., Zettle, R.D., 2011. Preliminary psychometric properties of the Acceptance and

458 Action Questionnaire–II: A revised measure of psychological inflexibility and experiential  
459 avoidance. *Behavior therapy* 42(4), 676-688.

460 Borchardt, C.M., Garfinkel, B.D., 1991. Predictors of length of stay of psychiatric  
461 adolescent inpatients. *Journal of the American Academy of Child & Adolescent*  
462 *Psychiatry* 30(6), 994-998.

463 Borges, G., Angst, J., Nock, M.K., Ruscio, A.M., Walters, E.E., Kessler, R.C., 2006. A  
464 risk index for 12-month suicide attempts in the National Comorbidity Survey Replication  
465 (NCS-R). *Psychological medicine* 36(12), 1747-1757.

466 Bressi, S.K., Marcus, S.C., Solomon, P.L., 2006. The impact of psychiatric comorbidity  
467 on general hospital length of stay. *Psychiatric Quarterly* 77(3), 203-209.

468 Caspi, A., Moffitt, T.E., 2018. All for one and one for all: Mental disorders in one  
469 dimension. *American Journal of Psychiatry* 175(9), 831-844.

470 Celeux, G., Soromenho, G., 1996. An entropy criterion for assessing the number of  
471 clusters in a mixture model. *Journal of classification* 13(2), 195-212.

472 Clapp, J.D., Grubaugh, A.L., Allen, J.G., Mahoney, J., Oldham, J.M., Fowler, J.C., Ellis,  
473 T., Elhai, J.D., Frueh, B.C., 2013. Modeling trajectory of depressive symptoms among  
474 psychiatric inpatients: a latent growth curve approach. *The Journal of clinical psychiatry*  
475 74(5), 492.

476 Cohen, C.I., Casimir, G.J., 1989. Factors associated with increased hospital stay by  
477 elderly psychiatric patients. *Psychiatric Services* 40(7), 741-743.

478 Compton, M.T., Craw, J., Rudisch, B.E., 2006. Determinants of inpatient psychiatric  
479 length of stay in an urban county hospital. *Psychiatric Quarterly* 77(2), 173-188.

- 480 Crosby, A.E., Cheltenham, M.P., Sacks, J.J., 1999. Incidence of suicidal ideation and  
481 behavior in the United States, 1994. *Suicide and Life-Threatening Behavior* 29(2), 131-  
482 140.
- 483 Czyz, E.K., King, C.A., 2015. Longitudinal trajectories of suicidal ideation and  
484 subsequent suicide attempts among adolescent inpatients. *Journal of Clinical Child &*  
485 *Adolescent Psychology* 44(1), 181-193.
- 486 Desai, R.A., Dausey, D.J., Rosenheck, R.A., 2005. Mental health service delivery and  
487 suicide risk: the role of individual patient and facility factors. *American Journal of*  
488 *Psychiatry* 162(2), 311-318.
- 489 Draper, B., Luscombe, G., 1998. Quantification of factors contributing to length of stay  
490 in an acute psychogeriatrics ward. *International Journal of Geriatric Psychiatry* 13(1), 1-  
491 7.
- 492 Enders, C.K., Tofighi, D., 2008. The impact of misspecifying class-specific residual  
493 variances in growth mixture models. *Structural Equation Modeling: A Multidisciplinary*  
494 *Journal* 15(1), 75-95.
- 495 First, M., Williams, J., Karg, R., Spitzer, R., 2015. Structured clinical interview for DSM-  
496 5—Research version (SCID-5 for DSM-5, research version; SCID-5-RV). Arlington, VA:  
497 American Psychiatric Association.
- 498 First, M.B., 1997. Structured clinical interview for DSM-IV axis I disorders. Biometrics  
499 Research Department.
- 500 Furlanetto, L.M., da Silva, R.V., 2003. The impact of psychiatric comorbidity on length of  
501 stay of medical inpatients. *General hospital psychiatry* 25(1), 14-19.

502 Glick, I.D., Sharfstein, S.S., Schwartz, H.I., 2011. Inpatient psychiatric care in the 21st  
503 century: the need for reform. *Am Psychiatric Assoc.*

504 Goldacre, M., Seagroatt, V., Hawton, K., 1993. Suicide after discharge from psychiatric  
505 inpatient care. *The Lancet* 342(8866), 283-286.

506 Gomez, R., Skilbeck, C., Thomas, M., Slatyer, M., 2017. Growth mixture modeling of  
507 depression symptoms following traumatic brain injury. *Frontiers in psychology* 8, 1320.

508 Gratz, K.L., Roemer, L., 2004. Multidimensional assessment of emotion regulation and  
509 dysregulation: Development, factor structure, and initial validation of the difficulties in  
510 emotion regulation scale. *Journal of psychopathology and behavioral assessment* 26(1),  
511 41-54.

512 Gross, J.J., Muñoz, R.F., 1995. Emotion regulation and mental health. *Clinical*  
513 *psychology: Science and practice* 2(2), 151-164.

514 Hallak, J., Crippa, J., Vansan, G., Zuardi, A., 2003. Diagnostic profile of inpatients as a  
515 determinant of length of stay in a general hospital psychiatric unit. *Brazilian journal of*  
516 *medical and biological research* 36(9), 1233-1240.

517 Harris, E.C., Barraclough, B., 1997. Suicide as an outcome for mental disorders: a  
518 meta-analysis. *The British journal of psychiatry* 170(3), 205-228.

519 Hartwig, E.M., Rufino, K.A., Palmer, C.A., Shepard, C., Alfano, C.A., Schanzer, B.,  
520 Mathew, S.J., Patriquin, M.A., 2019. Trajectories of self-reported sleep disturbance  
521 across inpatient psychiatric treatment predict clinical outcome in comorbid major  
522 depressive disorder and generalized anxiety disorder. *Journal of affective disorders* 251,  
523 248-255.

524 Hayes, S.C., Strosahl, K., Wilson, K.G., Bissett, R.T., Pistorello, J., Toarmino, D.,  
525 Polusny, M.A., Dykstra, T.A., Batten, S.V., Bergan, J., 2004. Measuring experiential  
526 avoidance: A preliminary test of a working model. *The psychological record* 54(4), 553-  
527 578.

528 Henson, J.M., Reise, S.P., Kim, K.H., 2007. Detecting mixtures from structural model  
529 differences using latent variable mixture modeling: A comparison of relative model fit  
530 statistics. *Structural Equation Modeling: A Multidisciplinary Journal* 14(2), 202-226.

531 Hirsch, S., Platt, S., Knights, A., Weyman, A., 1979. Shortening hospital stay for  
532 psychiatric care: effect on patients and their families. *Br Med J* 1(6161), 442-446.

533 Hopko, D.R., Lachar, D., Bailey, S.E., Varner, R.V., 2001. Assessing predictive factors  
534 for extended hospitalization at acute psychiatric admission. *Psychiatric Services* 52(10),  
535 1367-1373.

536 Huntley, D.A., Cho, D.W., Christman, J., Csernansky, J.G., 1998. Predicting length of  
537 stay in an acute psychiatric hospital. *Psychiatric Services* 49(8), 1049-1053.

538 Jiménez, R.E., Lam, R.M., Marot, M., Delgado, A., 2004. Observed-predicted length of  
539 stay for an acute psychiatric department, as an indicator of inpatient care inefficiencies.  
540 Retrospective case-series study. *BMC health services research* 4(1), 4.

541 Johnstone, P., Zolese, G., 1999. Systematic review of the effectiveness of planned  
542 short hospital stays for mental health care. *BmJ* 318(7195), 1387-1390.

543 Kandel, D.B., Davies, M., 1982. Epidemiology of depressive mood in adolescents: An  
544 empirical study. *Archives of general psychiatry* 39(10), 1205-1212.

545 Kashdan, T.B., Rottenberg, J., 2010. Psychological flexibility as a fundamental aspect of  
546 health. *Clinical psychology review* 30(7), 865-878.



547 Kessler, R.C., Birnbaum, H., Bromet, E., Hwang, I., Sampson, N., Shahly, V., 2010. Age  
548 differences in major depression: results from the National Comorbidity Survey  
549 Replication (NCS-R). *Psychological medicine* 40(2), 225-237.

550 Kessler, R.C., Borges, G., Walters, E.E., 1999. Prevalence of and risk factors for  
551 lifetime suicide attempts in the National Comorbidity Survey. *Archives of general*  
552 *psychiatry* 56(7), 617-626.

553 Kessler, R.C., McGonagle, K.A., Zhao, S., Nelson, C.B., Hughes, M., Eshleman, S.,  
554 Wittchen, H.-U., Kendler, K.S., 1994. Lifetime and 12-month prevalence of DSM-III-R  
555 psychiatric disorders in the United States: results from the National Comorbidity Survey.  
556 *Archives of general psychiatry* 51(1), 8-19.

557 Kroenke, K., Spitzer, R.L., 2002. The PHQ-9: a new depression diagnostic and severity  
558 measure. *Psychiatric annals* 32(9), 509-515.

559 Kroenke, K., Spitzer, R.L., Williams, J.B., 2001. The PHQ-9: validity of a brief  
560 depression severity measure. *Journal of general internal medicine* 16(9), 606-613.

561 Kunik, M.E., Edwards, M., Molinari, V.A., Hale, D.D., Orengo, C.A., 2001. Outcomes of  
562 decreased length of hospital stay among geriatric patients with dementia. *Psychiatric*  
563 *services* 52(3), 376-378.

564 Lieberman, P.B., Wiitala, S.A., Elliott, B., McCormick, S., Goyette, S.B., 1998.  
565 Decreasing length of stay: are there effects on outcomes of psychiatric hospitalization?  
566 *American Journal of Psychiatry* 155(7), 905-909.

567 Lin, H.-C., Tian, W.-H., Chen, C.-S., Liu, T.-C., Tsai, S.-Y., Lee, H.-C., 2006. The  
568 association between readmission rates and length of stay for schizophrenia: a 3-year  
569 population-based study. *Schizophrenia research* 83(2-3), 211-214.

570 Lyketsos, C.G., Dunn, G., Kaminsky, M.J., Breakey, W.R., 2002. Medical comorbidity in  
571 psychiatric inpatients: relation to clinical outcomes and hospital length of stay.  
572 *Psychosomatics* 43(1), 24-30.

573 Martin, L.A., Neighbors, H.W., Griffith, D.M., 2013. The experience of symptoms of  
574 depression in men vs women: analysis of the National Comorbidity Survey Replication.  
575 *JAMA psychiatry* 70(10), 1100-1106.

576 McLachlan, G.J., Lee, S.X., Rathnayake, S.I., 2000. Finite mixture models. *Annual*  
577 *Review of Statistics and Its Application*(0).

578 Mora, P.A., Bennett, I.M., Elo, I.T., Mathew, L., Coyne, J.C., Culhane, J.F., 2008.  
579 Distinct trajectories of perinatal depressive symptomatology: evidence from growth  
580 mixture modeling. *American journal of epidemiology* 169(1), 24-32.

581 Muthén, B., 2006. The potential of growth mixture modelling. *Infant and Child*  
582 *Development: An International Journal of Research and Practice* 15(6), 623-625.

583 Muthén, L., Muthén, B., 2018. *Mplus user's guide*. Version 8; 2017.

584 Nagin, D.S., 1999. Analyzing developmental trajectories: a semiparametric, group-  
585 based approach. *Psychological methods* 4(2), 139.

586 Nylund, K.L., Asparouhov, T., Muthén, B.O., 2007. Deciding on the number of classes in  
587 latent class analysis and growth mixture modeling: A Monte Carlo simulation study.  
588 *Structural equation modeling: A multidisciplinary Journal* 14(4), 535-569.

589 Oh, H., Lee, J., Gosnell, S.N., Patriquin, M., Kosten, T., Salas, R., 2020. Orbitofrontal,  
590 dorsal striatum, and habenula functional connectivity in psychiatric patients with  
591 substance use problems. *Addictive Behaviors*, 106457.

592 Ormel, J., VonKorff, M., Ustun, T.B., Pini, S., Korten, A., Oldehinkel, T., 1994. Common  
593 mental disorders and disability across cultures: results from the WHO Collaborative  
594 Study on Psychological Problems in General Health Care. *Jama* 272(22), 1741-1748.

595 Pettit, J.W., Averill, P.M., Wassef, A.A., Gruber, N.P., Schneider, L., 2005. Ratings of  
596 early major depressive disorder symptom change during a brief psychiatric  
597 hospitalization. *Psychiatric quarterly* 76(1), 33-48.

598 Pietrzak, R.H., Van Ness, P.H., Fried, T.R., Galea, S., Norris, F.H., 2013. Trajectories of  
599 posttraumatic stress symptomatology in older persons affected by a large-magnitude  
600 disaster. *Journal of psychiatric research* 47(4), 520-526.

601 Posner, K., Brown, G.K., Stanley, B., Brent, D.A., Yershova, K.V., Oquendo, M.A.,  
602 Currier, G.W., Melvin, G.A., Greenhill, L., Shen, S., 2011. The Columbia–Suicide  
603 Severity Rating Scale: initial validity and internal consistency findings from three  
604 multisite studies with adolescents and adults. *American Journal of Psychiatry* 168(12),  
605 1266-1277.

606 Posternak, M.A., Zimmerman, M., 2005. Is there a delay in the antidepressant effect? A  
607 meta-analysis. *J Clin Psychiatry* 66(2), 148-158.

608 Prinstein, M.J., Nock, M.K., Simon, V., Aikins, J.W., Cheah, C.S., Spirito, A., 2008.  
609 Longitudinal trajectories and predictors of adolescent suicidal ideation and attempts  
610 following inpatient hospitalization. *Journal of consulting and clinical psychology* 76(1),  
611 92.

612 Ram, N., Grimm, K.J., 2009. Methods and measures: Growth mixture modeling: A  
613 method for identifying differences in longitudinal change among unobserved groups.  
614 *International journal of behavioral development* 33(6), 565-576.

615 Ramaswamy, V., DeSarbo, W.S., Reibstein, D.J., Robinson, W.T., 1993. An empirical  
616 pooling approach for estimating marketing mix elasticities with PIMS data. *Marketing*  
617 *Science* 12(1), 103-124.

618 Rocca, P., Mingrone, C., Mongini, T., Montemagni, C., Pulvirenti, L., Rocca, G., Bogetto,  
619 F., 2010. Outcome and length of stay in psychiatric hospitalization, the experience of  
620 the University Clinic of Turin. *Social psychiatry and psychiatric epidemiology* 45(6), 603-  
621 610.

622 Rúaño, G., Szarek, B.L., Villagra, D., Gorowski, K., Kocherla, M., Seip, R.L., Goethe,  
623 J.W., Schwartz, H.I., 2013. Length of psychiatric hospitalization is correlated with  
624 CYP2D6 functional status in inpatients with major depressive disorder. *Biomarkers in*  
625 *medicine* 7(3), 429-439.

626 Saravay, S.M., 1994. Psychiatric comorbidity and length of stay in the general hospital:  
627 a critical review of outcome studies. *Psychosomatics* 35(3), 233-252.

628 SAS Institute, I., 2013. SAS® 9.4 [Computer software]. Author Cary, NC.

629 Saunders, R., Buckman, J.E., Cape, J., Fearon, P., Leibowitz, J., Pilling, S., 2019.  
630 Trajectories of depression and anxiety symptom change during psychological therapy.  
631 *Journal of affective disorders* 249, 327-335.

632 Saunders, R., Buckman, J.E., Pilling, S., 2020. Latent variable mixture modelling and  
633 individual treatment prediction. *Behaviour Research and Therapy* 124, 103505.

634 Sclove, S.L., 1987. Application of model-selection criteria to some problems in  
635 multivariate analysis. *Psychometrika* 52(3), 333-343.

636 Sloan, D.M., Yokley, J., Gottesman, H., Schubert, D.S., 1999. A five-year study on the  
637 interactive effects of depression and physical illness on psychiatric unit length of stay.  
638 *Psychosomatic medicine* 61(1), 21-25.

639 Smith, G.T., Atkinson, E.A., Davis, H.A., Riley, E.N., Oltmanns, J.R., 2020. The general  
640 factor of psychopathology. *Annual Review of Clinical Psychology* 16.

641 Spitzer, R.L., Kroenke, K., Williams, J.B., Löwe, B., 2006. A brief measure for assessing  
642 generalized anxiety disorder: the GAD-7. *Archives of internal medicine* 166(10), 1092-  
643 1097.

644 Stevens, A., Hammer, K., Buchkremer, G., 2001. A statistical model for length of  
645 psychiatric in-patient treatment and an analysis of contributing factors. *Acta Psychiatrica*  
646 *Scandinavica* 103(3), 203-211.

647 Stiles, W.B., Leach, C., Barkham, M., Lucock, M., Iveson, S., Shapiro, D.A., Iveson, M.,  
648 Hardy, G.E., 2003. Early sudden gains in psychotherapy under routine clinic conditions:  
649 Practice-based evidence. *Journal of consulting and clinical psychology* 71(1), 14.

650 Sturm, R., Bao, Y., 2000. Datapoints: psychiatric care expenditures and length of stay:  
651 trends in industrialized countries. *Psychiatric Services* 51(3), 295-295.

652 Üstün, T.B., Kostanjsek, N., Chatterji, S., Rehm, J., 2010. Measuring health and  
653 disability: Manual for WHO disability assessment schedule WHODAS 2.0. World Health  
654 Organization.

655 Warnke, I., Rossler, W., 2008. Length of stay by ICD-based diagnostic groups as basis  
656 for the remuneration of psychiatric inpatient care in Switzerland? *Swiss medical weekly*  
657 138(35), 520.

658

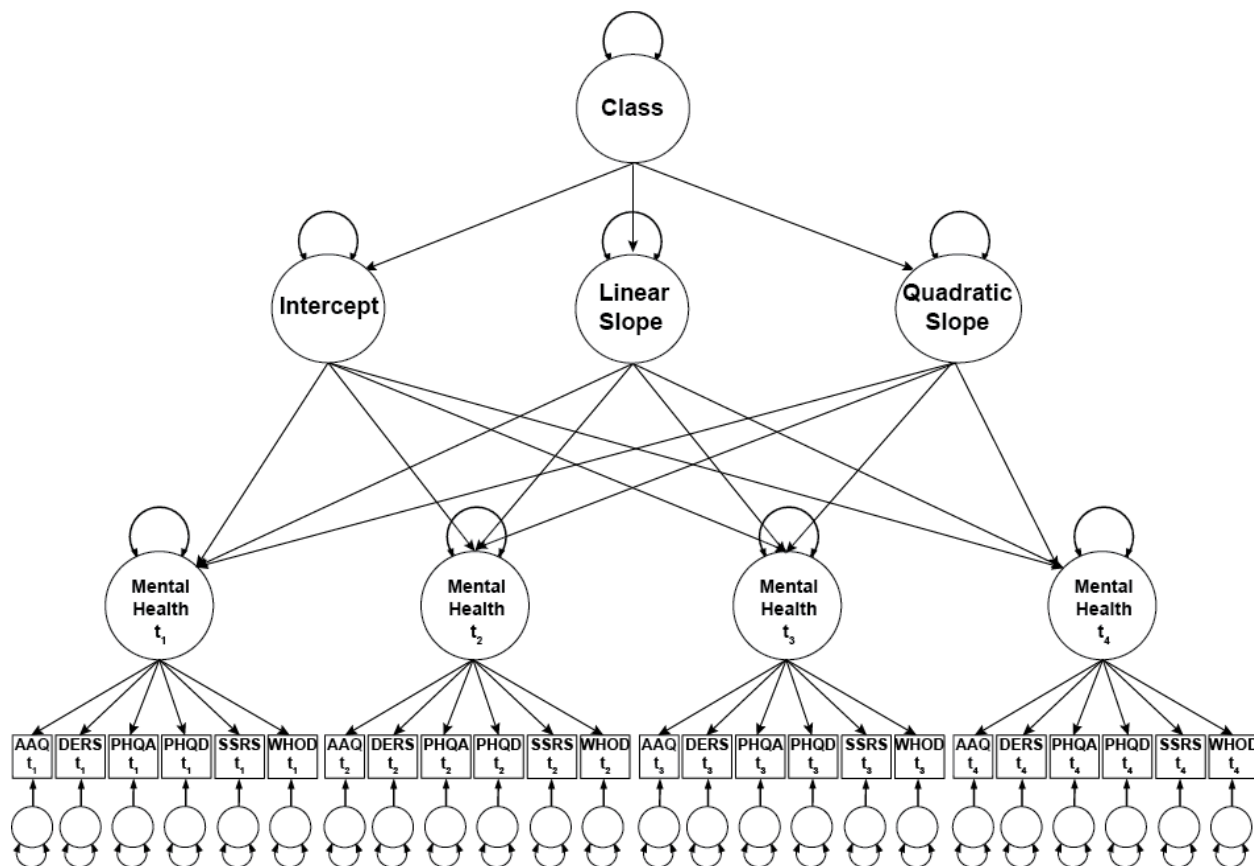

659

660 **Fig 1. An example of fitted growth mixture models (GMM).** t1: admission, t2: week 2,

661 t3: week 4, t4: week6, AAQ: psychological flexibility, DERS: emotion regulation problem,

662 PHQA: anxiety, PHQD: depression, SSRS: suicide ideation severity, WHOD: disability.

663

664

665

666

667

668

669

670

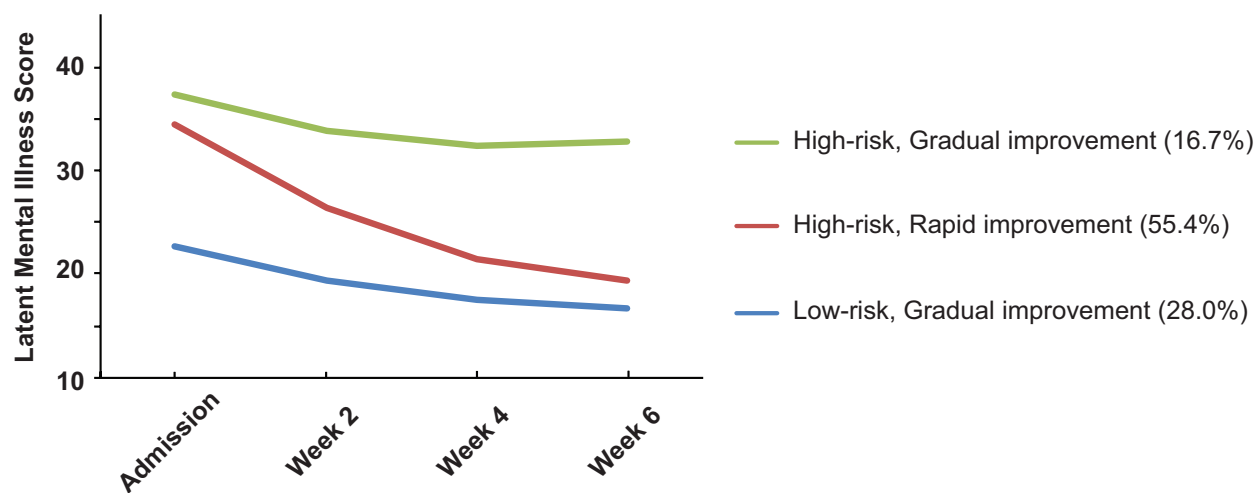

671  
672 **Fig 2. Latent mental illness score in identified classes.** Higher latent mental illness  
673 scores indicate more disabled mental illness.

674  
675  
676  
677  
678  
679  
680  
681  
682  
683  
684  
685  
686

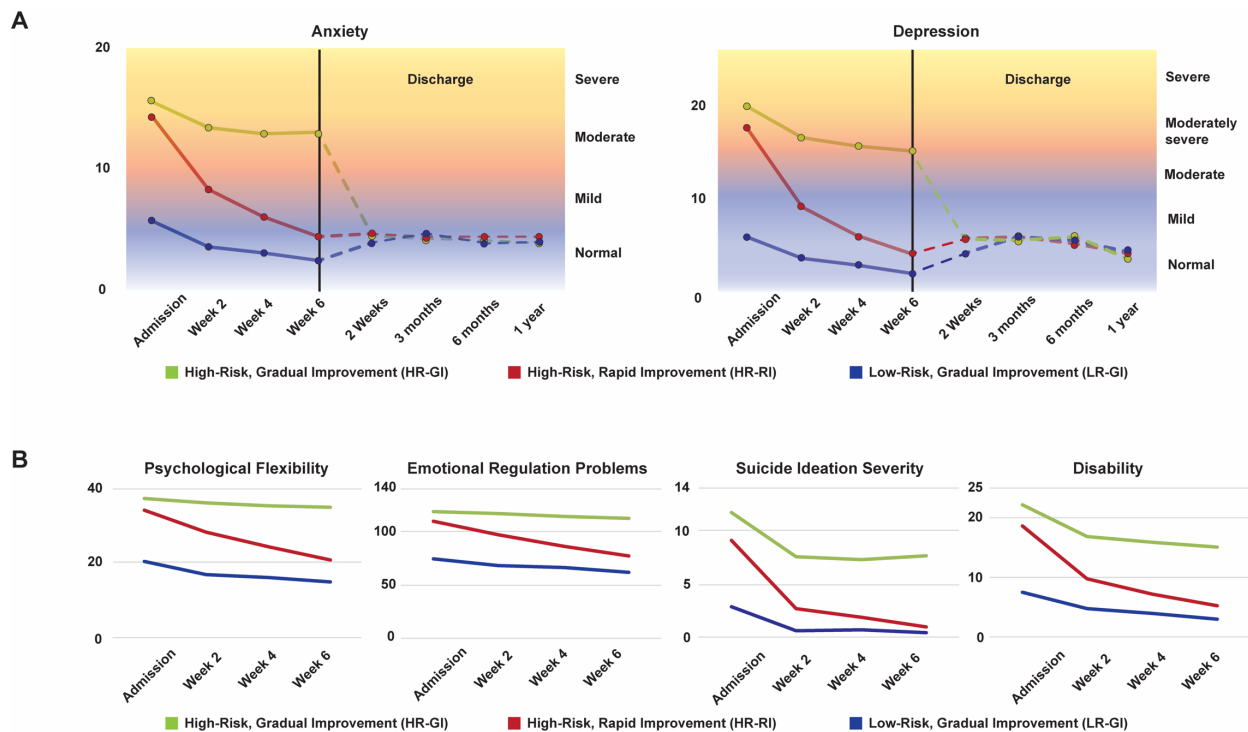

687

688 **Fig 3. Observed scores of six indicators of mental illness.** A. Each number at

689 Anxiety and Depression indicates the mean of PHQANXIETY and PHQDEPRESSION,

690 respectively. Follow-up assessments after discharge were characterized in the normal

691 range. B. Each number at Psychological Flexibility, Emotional Regulation Problems,

692 Suicide Ideation Severity and Disability indicates the mean of AAQ, DERS, SSRS and

693 WHOD scores, respectively.



| Variable                               | HR-RI<br>(n = 1878, 55.4%) |       | LR-GI<br>(n = 948, 28.0%) |       | HR-GI<br>(n = 565, 16.7%) |       | Overall difference |         |        | Pairwise difference (p) |                       |                   |
|----------------------------------------|----------------------------|-------|---------------------------|-------|---------------------------|-------|--------------------|---------|--------|-------------------------|-----------------------|-------------------|
|                                        | M/N                        | SD/%  | M/N                       | SD/%  | M/N                       | SD/%  | F/ $\chi^2$        | df      | p      | HR-RI<br>vs LR-GI       | HR-RI<br>vs HR-<br>GI | LR-GI vs<br>HR-GI |
| <b>Age</b>                             | 35.26                      | 14.99 | 36.38                     | 15.79 | 33.24                     | 13.71 | 7.76               | 2, 3388 | < .001 | .182                    | .015                  | < .001            |
| <b>Sex</b>                             |                            |       |                           |       |                           |       | 85.18              | 2       | < .001 |                         |                       |                   |
| Female                                 | 946                        | 50.4% | 347                       | 36.6% | 338                       | 59.8% |                    |         |        |                         |                       |                   |
| Male                                   | 932                        | 49.6% | 601                       | 63.4% | 227                       | 40.2% |                    |         |        |                         |                       |                   |
| <b>Ethnicity</b>                       |                            |       |                           |       |                           |       | 11.37              | 10      | .330   |                         |                       |                   |
| American Indian or Alaskan<br>native   | 3                          | 0.2%  | 3                         | 0.3%  | 0                         | 0.0%  |                    |         |        |                         |                       |                   |
| Asian                                  | 44                         | 2.3%  | 14                        | 1.5%  | 13                        | 2.3%  |                    |         |        |                         |                       |                   |
| Black or African-American              | 22                         | 1.2%  | 22                        | 2.3%  | 8                         | 1.4%  |                    |         |        |                         |                       |                   |
| White/Caucasian                        | 1683                       | 89.6% | 833                       | 87.9% | 509                       | 90.1% |                    |         |        |                         |                       |                   |
| Native Hawaiian or Pacific<br>Islander | 9                          | 0.5%  | 2                         | 0.2%  | 2                         | 0.4%  |                    |         |        |                         |                       |                   |
| Multiracial or other                   | 98                         | 5.2%  | 49                        | 5.2%  | 28                        | 5.0%  |                    |         |        |                         |                       |                   |
| Missing                                | 19                         | 1.0%  | 25                        | 2.6%  | 5                         | 0.9%  |                    |         |        |                         |                       |                   |
| <b>Highest level of education</b>      |                            |       |                           |       |                           |       | 22.08              | 18      | .228   |                         |                       |                   |
| Some elementary school                 | 1                          | 0.1%  | 0                         | 0.0%  | 1                         | 0.2%  |                    |         |        |                         |                       |                   |
| Some middle school (junior high)       | 170                        | 9.2%  | 87                        | 9.4%  | 46                        | 8.3%  |                    |         |        |                         |                       |                   |
| Some high school                       | 0                          | 0.0%  | 3                         | 0.3%  | 0                         | 0.0%  |                    |         |        |                         |                       |                   |
| High school diploma or<br>equivalent   | 41                         | 2.2%  | 23                        | 2.5%  | 10                        | 1.8%  |                    |         |        |                         |                       |                   |
| Some college                           | 161                        | 8.7%  | 78                        | 8.4%  | 50                        | 9.0%  |                    |         |        |                         |                       |                   |
| Technical or associates degree         | 631                        | 34.1% | 309                       | 33.3% | 219                       | 39.6% |                    |         |        |                         |                       |                   |
| Bachelor's degree                      | 81                         | 4.4%  | 29                        | 3.1%  | 22                        | 4.0%  |                    |         |        |                         |                       |                   |
| Master's degree                        | 552                        | 29.8% | 281                       | 30.3% | 143                       | 25.9% |                    |         |        |                         |                       |                   |
| Doctoral degree                        | 190                        | 10.3% | 105                       | 11.3% | 57                        | 10.3% |                    |         |        |                         |                       |                   |
| Professional degree (JD, MD)           | 25                         | 1.3%  | 12                        | 1.3%  | 5                         | 0.9%  |                    |         |        |                         |                       |                   |
| <b>Marital status</b>                  |                            |       |                           |       |                           |       | 7.15               | 10      | 0.711  |                         |                       |                   |
| Married                                | 475                        | 25.8% | 256                       | 27.7% | 130                       | 23.8% |                    |         |        |                         |                       |                   |
| Separated                              | 90                         | 4.9%  | 45                        | 4.9%  | 27                        | 4.9%  |                    |         |        |                         |                       |                   |
| Divorced                               | 170                        | 9.2%  | 85                        | 9.2%  | 46                        | 8.4%  |                    |         |        |                         |                       |                   |
| Widowed                                | 26                         | 1.4%  | 16                        | 1.7%  | 4                         | 0.7%  |                    |         |        |                         |                       |                   |

|                                |      |       |     |       |     |       |
|--------------------------------|------|-------|-----|-------|-----|-------|
| Never married                  | 1054 | 57.3% | 510 | 55.3% | 330 | 60.4% |
| Living with someone as married | 23   | 1.3%  | 11  | 1.2%  | 9   | 1.6%  |

---

694 **Table 1. Comparisons of demographic variables between the classes.** HR-RI: High-risk, Rapid improvement, LR-GI:

695 Low-risk, Gradual improvement, HR-GI: High-risk, Gradual improvement, M: mean, SD: standard deviation.

696

697

698

699

700

701

702

703

704

705

706

707

708

709

| Variable                                                                                                                              | HR-RI<br>(n = 1878, 55.4%) |       | LR-GI<br>(n = 948, 28.0%) |       | HR-GI<br>(n = 565, 16.7%) |       | Overall difference |         |      | Pairwise difference (p) |                       |                   |
|---------------------------------------------------------------------------------------------------------------------------------------|----------------------------|-------|---------------------------|-------|---------------------------|-------|--------------------|---------|------|-------------------------|-----------------------|-------------------|
|                                                                                                                                       | M/N                        | SD/%  | M/N                       | SD/%  | M/N                       | SD/%  | F/ $\chi^2$        | df      | p    | HR-RI<br>vs LR-GI       | HR-RI<br>vs HR-<br>GI | LR-GI vs<br>HR-GI |
| <b>Over the course of your life, how much psychotherapy (talk therapy) with a mental health professional have you had (in month)?</b> | 70.55                      | 85.07 | 66.11                     | 82.77 | 70.55                     | 85.97 | 0.92               | 2, 3388 | .398 | .577                    | 1.000                 | .987              |
| <b>How many different therapists have you seen?</b>                                                                                   | 4.27                       | 4.33  | 3.96                      | 2.97  | 4.15                      | 3.67  | 1.91               | 2, 3388 | .148 | .152                    | 1.000                 | 1.000             |
| <b>How many different psychiatrists or health care providers have you seen (for medication) for a mental disorder?</b>                | 3.22                       | 3.64  | 2.97                      | 2.32  | 3.10                      | 2.56  | 2.04               | 2, 3388 | .130 | .137                    | 1.000                 | 1.000             |
| <b>How many times have you been admitted for acute/crisis psychiatric hospital care (i.e., 1-5 days)?</b>                             | 1.58                       | 4.98  | 1.39                      | 2.96  | 1.40                      | 2.48  | 0.86               | 2, 3388 | .425 | .732                    | 1.000                 | 1.000             |
| <b>How many times have you been admitted for extended psychiatric hospital treatment (i.e., more than 5 days)?</b>                    | 1.19                       | 4.02  | 1.11                      | 2.10  | 1.16                      | 2.11  | 0.18               | 2, 3388 | .839 | 1.000                   | 1.000                 | 1.000             |
| <b>Have you stopped medication against or without your doctor's advice?</b>                                                           |                            |       |                           |       |                           |       | 1.43               | 2       | .489 |                         |                       |                   |
| Yes                                                                                                                                   | 824                        | 44.5% | 395                       | 42.6% | 252                       | 45.6% |                    |         |      |                         |                       |                   |
| No                                                                                                                                    | 1028                       | 55.5% | 532                       | 57.4% | 301                       | 54.4% |                    |         |      |                         |                       |                   |
| <b>Have you stopped therapy against or without your therapist's advice?</b>                                                           |                            |       |                           |       |                           |       | 0.20               | 2       | .906 |                         |                       |                   |
| Yes                                                                                                                                   | 635                        | 34.3% | 310                       | 33.4% | 188                       | 34.0% |                    |         |      |                         |                       |                   |

|                                |       |       |       |       |       |       |      |         |       |       |       |       |
|--------------------------------|-------|-------|-------|-------|-------|-------|------|---------|-------|-------|-------|-------|
| No                             | 1217  | 65.7% | 617   | 66.6% | 365   | 66.0% |      |         |       |       |       |       |
| <b>Length of stay (in day)</b> | 41.49 | 20.25 | 42.27 | 21.90 | 44.40 | 21.29 | 4.20 | 2, 3388 | .015  | 1.000 | .011  | 0.170 |
| <b>SSRI</b>                    |       |       |       |       |       |       |      |         |       |       |       |       |
| Scheduled                      | 35.37 | 24.67 | 34.57 | 26.47 | 41.69 | 29.13 | 5.91 | 2       | .0028 | 1.000 | .0051 | .0051 |
| Taken                          | 34.82 | 24.28 | 34.01 | 25.84 | 41.33 | 28.59 | 6.46 | 2       | .0016 | 1.000 | .0030 | .0032 |
| <b>Antidepressant other</b>    |       |       |       |       |       |       |      |         |       |       |       |       |
| Scheduled                      | 38.62 | 34.28 | 38.59 | 30.51 | 45.51 | 39.96 | 4.74 | 2       | .0089 | 1.000 | .0099 | .0242 |
| Taken                          | 37.84 | 33.61 | 37.66 | 29.98 | 44.68 | 39.03 | 4.9  | 2       | .0076 | 1.000 | .0091 | .019  |
| <b>Hypnotic</b>                |       |       |       |       |       |       |      |         |       |       |       |       |
| Scheduled                      | 20.23 | 20.27 | 28.77 | 28.05 | 27.55 | 22    | 6.12 | 2       | .0024 | .0043 | .0659 | 1.000 |
| Taken                          | 19.79 | 19.72 | 27.97 | 27.29 | 26.87 | 21.46 | 5.93 | 2       | .0029 | .0052 | .0688 | 1.000 |
| <b>Psychotherapy sessions</b>  |       |       |       |       |       |       |      |         |       |       |       |       |
| Psychodynamic                  | 8.35  | 7.02  | 8.74  | 7.47  | 8.71  | 7.31  | .99  | 2       | .3731 | .6292 | 1.000 | 1.000 |
| Cognitive-Behavior Therapy     | 1.22  | 4.02  | 1.27  | 3.72  | 1.35  | 3.82  | .21  | 2       | .8114 | 1.000 | 1.000 | 1.000 |
| Family Therapy                 | 0.6   | 1.89  | 0.69  | 2.06  | 0.62  | 1.97  | .51  | 2       | .6012 | .9431 | 1.000 | 1.000 |

710

711 **Table 2. Comparisons of treatment variables and length of stay between the classes.** HR-RI: High-risk, Rapid  
712 improvement, LR-GI: Low-risk, Gradual improvement, HR-GI: High-risk, Gradual improvement, M: mean, SD: standard  
713 deviation, SSRI: Selective Serotonin Reuptake Inhibitors.

714

715

716

717

718

| Model                   |         | LL      | # parameters | BIC    | Entropy |
|-------------------------|---------|---------|--------------|--------|---------|
| <b>Linear growth</b>    | 1-class | -199336 | 78           | 399306 | -       |
|                         | 2-class | -195033 | 81           | 390724 | 1.000   |
|                         | 3-class | -194920 | 84           | 390522 | 0.781   |
|                         | 4-class | -194873 | 87           | 389921 | 0.720   |
| <b>Quadratic growth</b> | 1-class | -199130 | 82           | 398927 | -       |
|                         | 2-class | -194674 | 86           | 390047 | 0.999   |
|                         | 3-class | -194509 | 90           | 389750 | 0.796   |
|                         | 4-class | -194412 | 94           | 389588 | 0.685   |

719

720 **Table 3. Optimal number of growth patterns (classes).** LL: log-likelihood, BIC: Bayesian information criterion.
